# Supplementary material for: Inborn Errors of Immunity in Children with Autoimmune and Allergic Complaints: A Single Center Experience from Diagnosis to Treatment
Source: MDPI journal article supplement (doi:10.3390/biomedicines11051299), 2023-04-27
Supplement: s1 [file s1]

**Table S3:** summary table of obtained results of all 30 enrolled patients

| Patient | Clinical features                                                                                                                                                             | Mutations discovered                                   | Immuno phenotype                             | Functional assays      |
|---------|-------------------------------------------------------------------------------------------------------------------------------------------------------------------------------|--------------------------------------------------------|----------------------------------------------|------------------------|
| RF1     | nd                                                                                                                                                                            | nd                                                     | normal                                       | nd                     |
| RF2     | autoimmune thyroiditis (maternal familiarity); alopecia; maternal familiarity for breast cancer                                                                               | nd                                                     | normal                                       | nd                     |
| RF3     | trilinear autoimmune cytopenia; urticaria; allergic rhinitis                                                                                                                  | -                                                      | RBE ↑;                                       | pSTAT3 ↓               |
| RF4     | severe dermatitis                                                                                                                                                             | nd                                                     | RBE ↑;                                       | nd                     |
| RF5     | intractable eczema; hypergammaglobulinemia (IgE)                                                                                                                              | -                                                      | normal                                       | -                      |
| RF6     | urticaria; angioedema; recurrent pericarditis; hypereosinophilia; unexplained fever; paternal familiarity for Hodgkin's lymphoma; hypergammaglobulinemia (IgM)                | nd                                                     | T lymphocytes CD8+ ↑;<br>CD4/CD8 ↓;<br>RTE ↓ | nd                     |
| RF7     | severe atopic dermatitis; severe eczema; food allergy; hypereosinophilia; persistent increase in inflammation indices; hypergammaglobulinemia (IgE)                           | nd                                                     | normal                                       | -                      |
| RF8     | poor severe growth; hypereosinophilia; ESR always high; hypergammaglobulinemia (IgE)                                                                                          | nd                                                     | B lymphocytes ↓;<br>T lymphocytes CD8+ ↑;    | nd                     |
| RF9     | bronchospasm at 2 years; hypereosinophilia; chronic cough; hypergammaglobulinemia (IgA)                                                                                       | nd                                                     | normal                                       | -                      |
| RF10    | autoimmune gastritis; splenomegaly; multiple lymphadenopathy; hypogammaglobulinemia; anemia                                                                                   | c.C6415T_p.R2139X<br>c.C7315T_p.R2439X<br>in LRBA gene | DNT αβ↑                                      | LRBA↓;<br>CTLA4↓; pS6↓ |
| RF11    | primary hypothyroidism; autoimmune enteropathy; rheumatoid arthritis; trilinear autoimmune cytopenia (haemolytic anemia, thrombocytopenia, neutropenia); recurrent infections | c.735ofG_p.A247Qfs*46<br>in FASLG gene                 | normal                                       | -                      |
| RF12    | dermatitis; enteropathy; hypergammaglobulinemia (IgA)                                                                                                                         | -                                                      | nd                                           | nd                     |

|      |                                                                                                                                                                                                                                                  |                  |                                                                               |          |
|------|--------------------------------------------------------------------------------------------------------------------------------------------------------------------------------------------------------------------------------------------------|------------------|-------------------------------------------------------------------------------|----------|
| RF13 | atopic dermatitis up to 2-3 years of age; punctate lesions with subsequent pus formation, accompanied by itching and scratching lesions; hypergammaglobulinemia (IgE)                                                                            | nd               | RBE ↑; Switched memory B cells ↓                                              | -        |
| RF14 | eczema; celiac disease; autoimmune neutropenia; autoimmune thrombocytopenia                                                                                                                                                                      | -                | DNTαβ ↑                                                                       | -        |
| RF15 | multiple lymphadenopathies; autoimmune haemolytic anemia; autoimmune neutropenia; autoimmune thrombocytopenia                                                                                                                                    | -                | DNTαβ ↑                                                                       | -        |
| RF16 | arthritis; autoimmune haemolytic anemia; autoimmune thrombocytopenia; lymphoproliferation defect; splenomegaly (spleen removed + paternal familiarity for splenic lymphoma)                                                                      | -                | B lymphocytes ↓; Switched memory B lymphocytes ↑; T lymphocytes CD8+ ↑; RTE ↓ | pSTAT3 ↑ |
| RF17 | hepatomegaly (linked to HLA) with increased liver enzymes; autoimmune cytopenia; lymphopenia; neonatal hypotonia; persistent increase in inflammation indices; Herpes virus infections; autoimmune thrombocytopenia; mild autoimmune neutropenia | -                | B lymphocytes ↑; RBE ↓; T lymphocytes ↓; RTE ↓                                | FoxP3 ↓  |
| RF18 | autoimmune enteropathy (onset at 2 months of life with vomiting, diarrhea, fever and shock); trilinear autoimmune cytopenia (anemia, thrombocytopenia, neutropenia) hypogammaglobulinemia (IgG, IgM)                                             | -                | normal                                                                        | -        |
| RF19 | early onset IBD; autoimmune cytopenia; lymphopenia; splenomegaly; unexplained fever                                                                                                                                                              | -                | B lymphocytes ↓; T lymphocytes CD8+ ↑; RTE ↓; RBE ↑                           | nd       |
| RF20 | autoimmune cytopenia; arthritis; mild splenomegaly; unexplained fever; recurrent infections                                                                                                                                                      | -                | normal                                                                        | -        |
| RF21 | vitiligo; autoimmune enteropathy; autoimmune thyroiditis (familiarity on the part of grandmother together with splenomegaly)                                                                                                                     | -                | DNTαβ ↑                                                                       | -        |
| RF22 |                                                                                                                                                                                                                                                  | c.A1721C_p.N574T | normal                                                                        | STAT1↑   |

|      |                                                                                                                                                                         |                                        |                          |              |
|------|-------------------------------------------------------------------------------------------------------------------------------------------------------------------------|----------------------------------------|--------------------------|--------------|
|      | recurrent oral candidiasis; aphthous stomatitis (RAS); autoimmune thyroiditis, autoimmune gastritis; hemolytic anemia                                                   | in STAT1 gene                          |                          |              |
| RF23 | autoimmune thyroiditis; autoimmune gastritis; alopecia; polyarthritis; hypogammaglobulinemia; anemia                                                                    | c.T310Cp.C104R in TNFRSF13B gene       | Switched memory B cells↓ | nd           |
| RF24 | atrophic gastritis; vitiligo                                                                                                                                            | -                                      | normal                   | nd           |
| RF25 | recurrent fevers; autoimmune thrombocytopenia; autoimmune hemolytic anemia; leukopenia; recurrent infections; severe hypogammaglobulinemia                              | c.G160A p.A54T in CTLA4 gene           | B Lymphocytes ↓; RTE↓    | pS6↓         |
| RF26 | ulcerative colitis; vitiligo; hepatosplenomegaly; polyarthritis; anemia; hypereosinophilia                                                                              | -                                      | normal                   | nd           |
| RF27 | vitiligo; scleroderma; mild hypogammaglobulinemia (IgG)                                                                                                                 | -                                      | normal                   | nd           |
| RF28 | autoimmune thrombocytopenia; severe hypogammaglobulinemia; chronic enteropathy; insulin-dependent type 1 diabetes mellitus; autoimmune thyroiditis; frequent infections | c.C223T p.R75W in CTLA4 gene           | B lymphocytes↓; RTE↓     | CTLA4↓; pS6↓ |
| RF29 | pericarditis; hypereosinophilia; atopic dermatitis; alopecia; coeliac disease                                                                                           | -                                      | normal                   | -            |
| RF30 | diarrhea; atopic eczema; leukocytosis; hypereosinophilia; coeliac disease; hypogammaglobulinemia (IgG)                                                                  | c.748_750ofAAG_p.K250del in FOXP3 gene | T lymphocytes CD8+ ↑     | nd           |

Note: RF, code to anonymize patients with also progressive numbers based on the timing of enrollment; nd, not done; -, not found. T lymphocytes (CD3+); B lymphocytes (CD19+); RTE = Recent Thymic Emigrants (CD3+CD4+CD31+CD45RA+); RBE = Recent Bone marrow Emigrants (CD19+ CD10+ CD38+); Regulatory T cells (CD3+ CD4+ CD25+ CD127-); DNT $\alpha\beta$  = double negative T cells with  $\alpha\beta$  T cell receptor (CD3+ CD4- CD8- TCR $\alpha\beta$ +); Switched Memory B cells (CD19+ CD27+ IgD/IgM-); CD8 memory T cells.
