# Supplementary material for: Inborn Errors of Immunity in Children with Autoimmune and Allergic Complaints: A Single Center Experience from Diagnosis to Treatment
Source: MDPI journal article supplement (doi:10.3390/biomedicines11051299), 2023-04-27
Supplement: s1 [file s1]

**Table S2.** Summary table of performed analysis of all 30 enrolled patients.

| Patient | Genetic analysis | Immuno phenotype | Functional assay                                                         | Transcriptomic analysis |
|---------|------------------|------------------|--------------------------------------------------------------------------|-------------------------|
| RF1     | nd               | ✓                | nd                                                                       | nd                      |
| RF2     | nd               | ✓                | nd                                                                       | nd                      |
| RF3     | WES              | ✓                | STAT3 and STAT5 phosphorylation                                          | nd                      |
| RF4     | nd               | ✓                | nd                                                                       | nd                      |
| RF5     | WES              | ✓                | CD86                                                                     | nd                      |
| RF6     | nd               | ✓                | nd                                                                       | nd                      |
| RF7     | nd               | ✓                | STAT3 and STAT5 phosphorylation                                          | nd                      |
| RF8     | nd               | ✓                | nd                                                                       | nd                      |
| RF9     | nd               | ✓                | CD86                                                                     | nd                      |
| RF10    | Panel of genes   | ✓                | CD86, CTLA4 expression, LRBA expression, S6 phosphorylation              | ✓                       |
| RF11    | WES              | ✓                | S6 phosphorylation                                                       | ✓                       |
| RF12    | WES              | nd               | nd                                                                       | nd                      |
| RF13    | nd               | ✓                | CD86                                                                     | nd                      |
| RF14    | WES              | ✓                | CD86                                                                     | nd                      |
| RF15    | Invitae panel    | ✓                | CD86                                                                     | nd                      |
| RF16    | WES              | ✓                | STAT3 and STAT5 phosphorylation, FOXP3 expression                        | nd                      |
| RF17    | WES              | ✓                | CD86, STAT3 and STAT5 phosphorylation, FOXP3 expression, TNFa expression | ✓                       |
| RF18    | WES              | ✓                | CTLA4 expression, FOXP3 expression                                       | nd                      |
| RF19    | WES              | ✓                | nd                                                                       | ✓                       |
| RF20    | WES              | ✓                | CD86, FOXP3 expression                                                   | nd                      |

|      |                |   |                                            |    |
|------|----------------|---|--------------------------------------------|----|
| RF21 | Invitae panel  | ✓ | CD86, STAT3 phosphorylation                | nd |
| RF22 | Panel of genes | ✓ | STAT1 expression                           | ✓  |
| RF23 | Invitae panel  | ✓ | nd                                         | nd |
| RF24 | Panel of genes | ✓ | nd                                         | nd |
| RF25 | Invitae panel  | ✓ | CD86, CTLA4 expression, S6 phosphorylation | ✓  |
| RF26 | Panel of genes | ✓ | nd                                         | nd |
| RF27 | Panel of genes | ✓ | nd                                         | nd |
| RF28 | Panel of genes | ✓ | CTLA4 expression, S6 phosphorylation       | nd |
| RF29 | Panel of genes | ✓ | CD86                                       | nd |
| RF30 | WES            | ✓ | nd                                         | ✓  |

Note: RF, code to anonymize patients with also progressive number based on the timing of enrollment; nd, not done; -, not found; ✓, analysis done. CD86 expression: CD86 is the more present isoform in B lymphocytes of CD28 receptor for which abatacept, like CTLA4, competes to inhibit the immune response triggered by the link between CD28 and the receptor CD86. So, we investigated CD86 expression in B lymphocytes cells versus healthy controls in flow cytometry to see if it was upregulated.

S6 phosphorylation: to investigate the link between FAS/FASLG pathway and CTLA4 pathway we analyzed the activation of mTOR/PI3K due to the ability of both pathways to influence the latter.
